# Supplementary material
Source: PubMed Central journal article supplement (PMC6291264)
Supplement: kgmi-09-03-1408763-s001.pdf [file kgmi-09-03-1408763-s001.pdf]

**Table S1:** Number of sequences per sample sequenced for 16S rRNA gene amplicon community analysis

| Sample Information |       | Treatment |                     |          | # Sequences |       |
|--------------------|-------|-----------|---------------------|----------|-------------|-------|
| Experimental Rep   | Mouse | Cecectomy | <i>C. rodentium</i> | Butyrate | PC          | DC    |
| A                  | 10A   | 0         | 1                   | 1        | 49126       | 33535 |
| C                  | 10C   | 0         | 1                   | 0        | 30893       | 18365 |
| D                  | 10D   | 0         | 1                   | 0        | 14579       | 26761 |
| B                  | 15B   | 1         | 0                   | 0        | 11665       | 27976 |
| D                  | 15D   | 1         | 0                   | 0        | 9266        | 38785 |
| A                  | 16A   | 1         | 0                   | 0        | 54301       | 4811  |
| B                  | 16B   | 1         | 1                   | 0        | 14051       | 13758 |
| D                  | 16D   | 1         | 0                   | 1        | 1844        | 37064 |
| A                  | 17A   | 1         | 0                   | 1        | 17765       | 7115  |
| B                  | 17B   | 1         | 0                   | 1        | 30774       | 9172  |
| D                  | 17D   | 1         | 1                   | 0        | 32874       | 11923 |
| A                  | 18A   | 1         | 1                   | 0        | 26785       | 29803 |
| B                  | 18B   | 1         | 1                   | 1        | 25849       | 18658 |
| C                  | 18C   | 1         | 0                   | 0        | 39062       | 13998 |
| D                  | 18D   | 1         | 1                   | 1        | 42292       | 1974  |
| A                  | 19A   | 1         | 1                   | 1        | 54567       | 18328 |
| C                  | 19C   | 1         | 0                   | 1        | 11508       | 19358 |
| C                  | 20C   | 1         | 1                   | 0        | 42992       | 5216  |
| B                  | 21B   | 0         | 0                   | 1        | 31471       | 26437 |
| B                  | 22B   | 0         | 1                   | 1        | 32133       | 12481 |
| D                  | 22D   | 0         | 1                   | 1        | 35449       | 12318 |
| B                  | 23B   | 0         | 1                   | 0        | 34165       | 22292 |
| C                  | 23C   | 0         | 1                   | 1        | 28989       | 18758 |
| C                  | 26C   | 0         | 1                   | 1        | 32596       | 32351 |
| D                  | 6D    | 0         | 0                   | 0        | 33380       | 9666  |
| A                  | 7A    | 0         | 0                   | 0        | 19838       | 48368 |
| A                  | 8A    | 0         | 0                   | 1        | 33402       | 28035 |
| B                  | 8B    | 0         | 0                   | 0        | 16704       | 42537 |
| C                  | 8C    | 0         | 0                   | 0        | 44057       | 32131 |
| D                  | 8D    | 0         | 0                   | 1        | 34718       | 27744 |
| A                  | 9A    | 0         | 1                   | 0        | 23365       | 29084 |
| C                  | 9C    | 0         | 0                   | 1        | 25286       | 25133 |

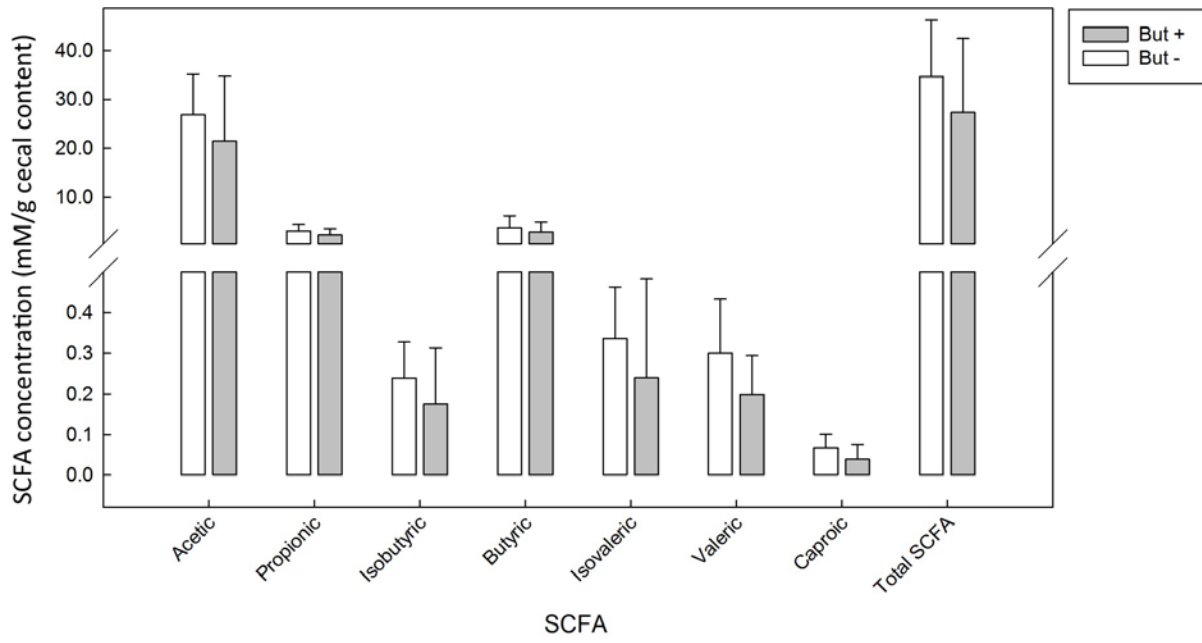

**Figure S1.** Concentrations of short chain fatty acids (SCFAs) in the cecal content of mice that were administered PBS (But-) or butyrate (But+) via colonic infusion. Data is representative of mice euthenized 7 and 14 days after oral administration of PBS or *Citrobacter rodentium*. Vertical lines associated with histogram bars represent standard error of the means (n=eight mice/treatment).

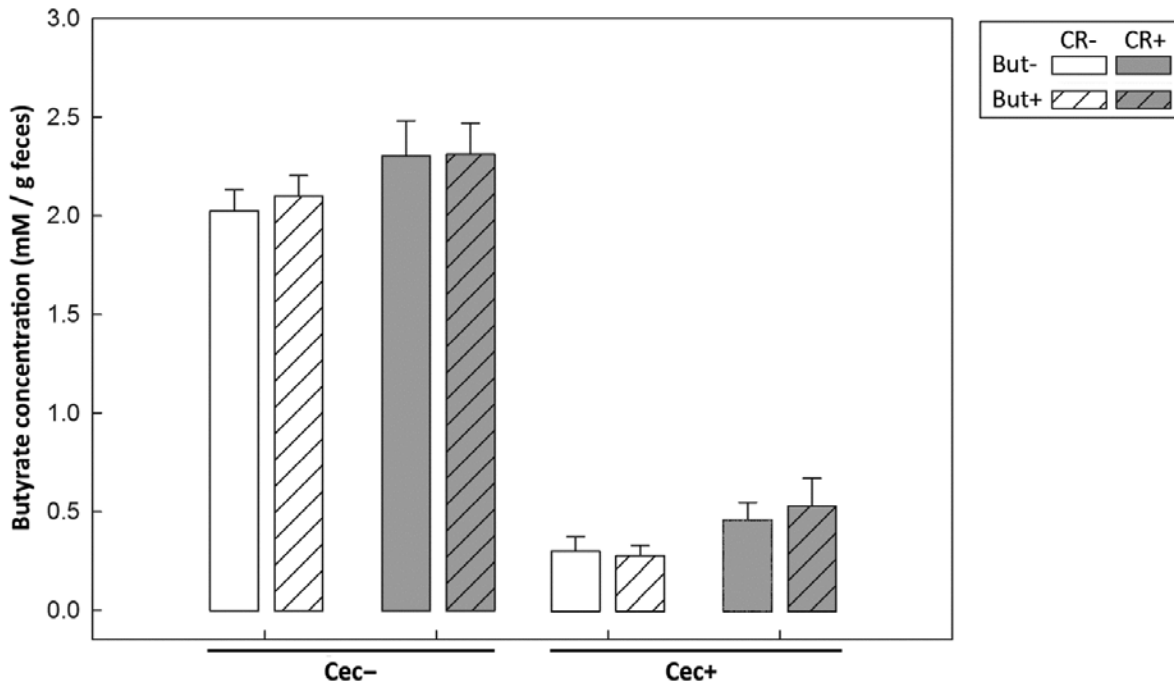

**Figure S2.** Concentrations of butyrate in feces from mice that received sham (Cec-) or cecectomy (Cec+) surgeries, were orally administered PBS (CR-) or *Citrobacter rodentium* (CR+), and received enemas containing PBS (But-) or butyrate (But+). Data is shown from fecal material collected over 5 weeks post-surgery. Vertical lines associated with histogram bars represent standard error of the means (n=55 to 75 fecal samples/treatment).

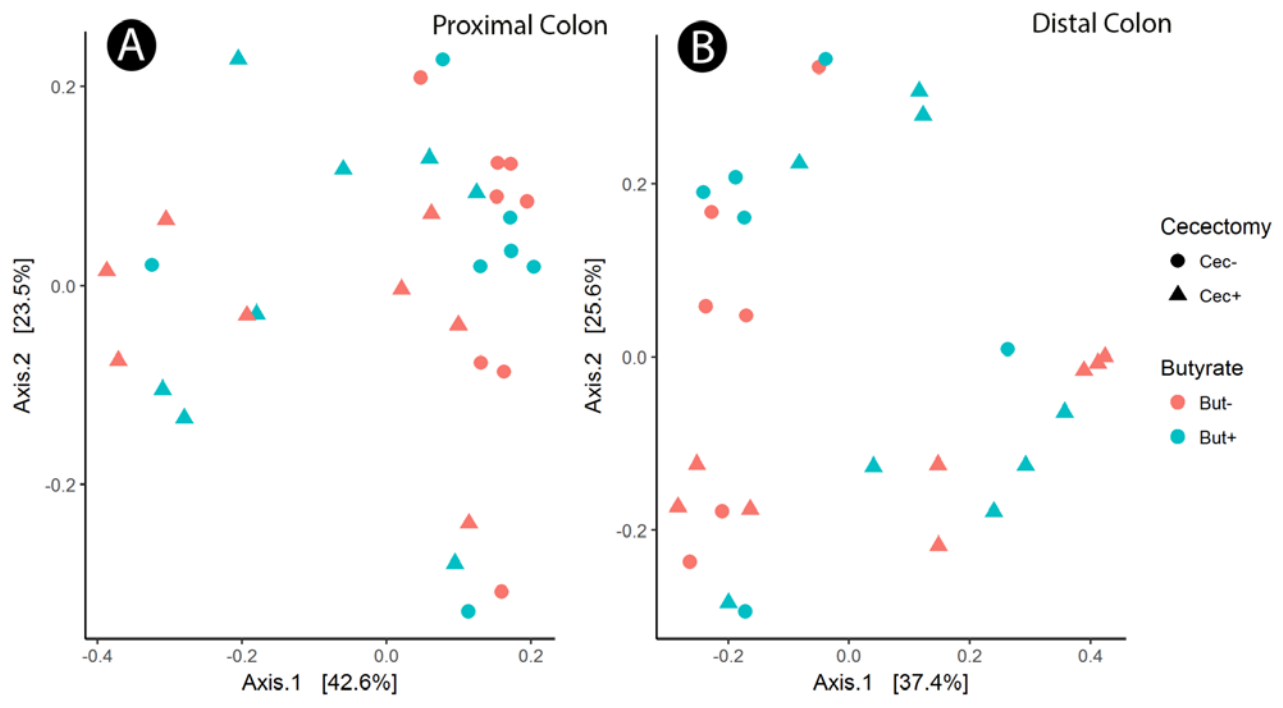

**Figure S3.** Principal component analysis based on Bray-Curtis dissimilarity in bacterial communities in the proximal (A) and distal (B) colon in mice that received sham (Cec-) or cecectomy (Cec+) surgeries, and were administered PBS (But-) or butyrate (But+) via enemas.

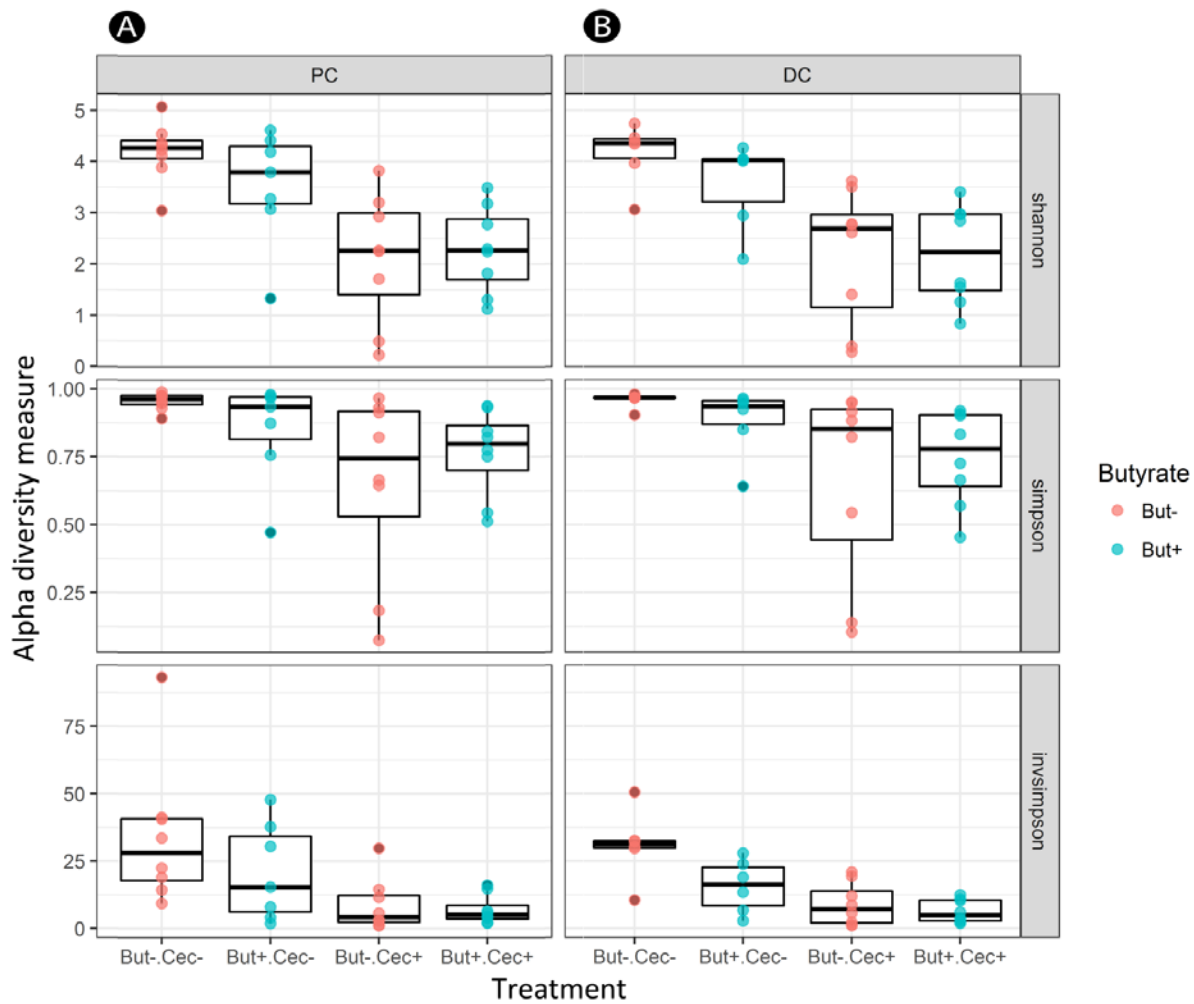

**Figure S4.** Alpha diversity of bacterial communities in the proximal (A) and distal (B) colon in mice that received sham (Cec-) or cecectomy (Cec+) surgeries and were administered PBS (But-) or butyrate (But+) via enema. Vertical lines associated with histogram bars represent standard error of the means (n=six to eight mice/treatment).

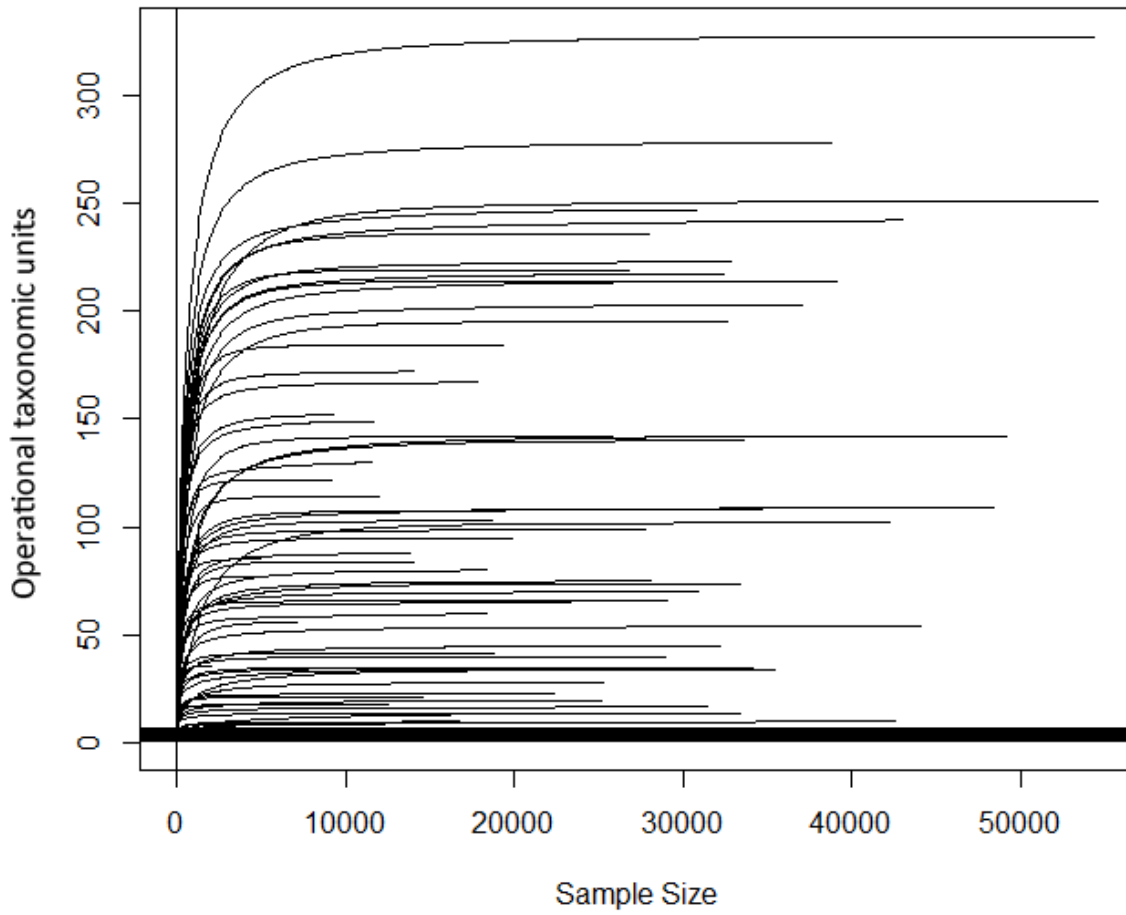

**Figure S5.** Rarefaction curves of processed samples from the proximal and distal colon of mice  $\pm$  cecum and  $\pm$  inoculated by *Citrobacter rodentium*.
